# Supplementary material for: From transmission to adaptive evolution: genomic surveillance of Getah virus
Source: Front Cell Infect Microbiol. 2025 Jun 4;15:1513392. doi: 10.3389/fcimb.2025.1513392 (PMC12174390; doi:10.3389/fcimb.2025.1513392)
Supplement: Supplementary file 1 [file Table1.xlsx]

## Sheet: Sheet1
Sequence	GenBank namber	Isolate	Strain	Host	Country	Region	Time
1	AB032553.1		GETV-SAGV	mosquito	Japan		1956
2	AY702913.1			swine	South Korea
3	EF011023.1	M1		mosquito	China		1964
4	EF631998.1	LEIV 16275 Mag		Aedes sp.	Russia		2000
5	EF631999.1	LEIV 17741 MPR		Culex sp.	Mongolia		2000
6	EU015061.1		M1	Culex sp.	China	Hainan province	1964
7	EU015062.1		HB0234	Culex tritaeniorhynchus Giles	China	Hebei province
8	EU015063.1		YN0540	Armigeres subalbatus	China	Yunnan province
9	KY363862.1	HNJZ-S1		pig	China		2011
10	KY363863.1	HNJZ-S2		pig	China		2015
11	KY399029.1	GETV-V1		pig	China		2016
12	KY450683.1		YN12042	Culex tritaeniorhynchus	China	Yunnan	2012
13	LC079086.1		MI-110-C1	Equus caballus	Japan	Ibaraki, Miho	1978
14	LC079087.1		MI-110-C2	Equus caballus	Japan	Ibaraki, Miho	1978
15	LC079088.1		14-I-605-C1	Equus caballus	Japan	Ibaraki, Miho	2014
16	LC079089.1		14-I-605-C2	Equus caballus	Japan	Ibaraki, Miho	2014
17	LC107870.1		SC1210	Armigeres subalbatus	China	Sichuan Province	2012
18	LC152056.1		12IH26	Culex tritaeniorhynchus	Japan	Nagasaki, Isahaya	2012
19	LC212972.1		15-I-752	Equus caballus	Japan	Ibaraki, Miho	2015
20	LC212973.1		15-I-1105	Sus scrofa domesticus	Japan	Ibaraki, Tsuchiura	2015
21	LC223130.1		16-I-599	Equus caballus	Japan	Ibaraki, Miho	2016
22	LC223131.1		16-I-674	Equus caballus	Japan	Ibaraki, Miho	2016
23	LC223132.1		16-I-676	Equus caballus	Japan	Ibaraki, Miho	2016
24	LC534253.1		GETV/SW/Thailand/2017	Sus scrofa	Thailand	Nakorn, Nayok	2017
25	MF741771.1		HuN1	porcine	China		2017
26	MG865965.1	AH9192		pig	China		2017
27	MG865966.1	HNNY-1		pig	China		2016
28	MG865967.1	HNNY-2		pig	China		2016
29	MG865968.1	HNPDS-1		pig	China		2017
30	MG865969.1	HNPDS-2		pig	China		2017
31	MG869691.1		JL17/08		China	Jilin	2017
32	MH106780.1	SD17/09		fox	China	Shandong	2017
33	MH722255.1	JL1707		mosquito	China	Jilin	2017
34	MH722256.1	JL1808		cattle	China	Jilin	2018
35	MK693225.1		SC201807	pig	China		2018
36	MN478486.1	SC483		pig	China		2018
37	MN478487.1	SC266		pig	China		2018
38	MN849355.1		MM2021	Culex gelidus	Malaysia		1955
39	MT086508.1	GETV-GDFS2-2018		domestic pig	China		2018
40	MT086509.1	GETV-GDFS9-2018		domestic pig	China		2018
41	MT210319.1	JS18		pig	China		2018
42	MT269657.1		GX201808	pig	China	Guangxi province	2018
43	MW404214.1		MM2021	mosquito	Malaysia		1955
44	MW410934.1		M 6-Mag 132	mosquito	Japan		1956
45	MW512827.1		NMDK1813-1	mosquitoes	China		2018
46	MZ388464.1	GETV-XJ-2019-07		horse	China		2019
47	MZ736786.1		SD201910	Sus scrofa	China	Shandong	2019
48	MZ736787.1		HuB201905	Sus scrofa	China	HuBei	2019
49	MZ736788.1		FJ202005-2	Sus scrofa	China	Fujina	2020
50	MZ736789.1		SX201809	Sus scrofa	China	Shanxi	2018
51	MZ736790.1		JX202004	Sus scrofa	China	Jiangxi
52	MZ736791.1		JS201809-2	Sus scrofa	China	Jiangsu	2018
53	MZ736792.1		HeN201907	Sus scrofa	China	Henan	2019
54	MZ736793.1		HeB201707	Sus scrofa	China	Hebei	2017
55	MZ736794.1		GX202005	Sus scrofa	China	Guangxi	2020
56	MZ736795.1		GX201909	Sus scrofa	China	Guangxi	2019
57	MZ736796.1		GX1	swine	China	Guangxi	2019
58	MZ736797.1		GD201909	Sus scrofa	China	Guangdong	2019
59	MZ736798.1		GD201907-1	Sus scrofa	China	Guangdong	2019
60	MZ736799.1		FJ201807-1	swine	China	Fujian	2018
61	MZ736800.1		HeN2021	Sus scrofa	China	Henan	2021
62	MZ736801.1		HeN202009-2	swine	China	Henan	2020
63	NC_006558.1			swine	South Korea
64	OK423758.1		SC202009	Sus scrofa	China		2020
65	OL352731.1	GETV-YL		pig	China		2021
66	OM363683.1	BJ0304		Sus scrofa	China		2021
67	ON843770.1	GDJM2022		domestic pig	China	Guangdong	2022
68	ON987235.1	GDQY2022		domestic pig	China	Guangdong	2022
69	OP004827.1		SC202010	pig	China		2020
70	OP004828.1		SCZY202010	pig	China		2020
71	OP593308.1		Rbsq202206	red-bellied tree squirrel	China	Fujian	2022
72	OP593309.1		dog202206	dog	China	Heilongjiang	2022
73	OP747412.1	GD2202	GD2202/mosquito/China/2/2022	Culex sp. (mosquito)	China		2022
74	OQ863732.1	GETV-JX-CHN-22-P7		swine	China	Jiangxi	2022
75	OQ968487.1	GETV-JX-CHN-22		swine	China	Jiangxi	2022
76	OR373097.1	GETV-China/GX2020		pangolin	China		2020
77	OR487192.1	GDHYLC23		pig	China	Guangdong Province	2023
78	OR371719.1	YN2305	YN2305/cattle/China/5/2023	cattle	China		2023
79	LC710656.1	16-0810-26		Aedes vexans nipponii	Japan	Ibaraki	2016
80	LC710657.1	19-703		Equus caballus	Japan	Ibaraki	2019
81	KY434327.1	YN12031		mosquito	China	Yunnan	2012
82	AB859822.1	Kochi/01/2005		Sus scrofa	Japan	Kochi	2005
